# Supplementary material
Source: ML conference proceedings conference paper supplement (https://proceedings.mlr.press/v38/root15.html)
Supplement: Supplementary file 1 [file root15-supp.pdf]

# Appendix: Proofs of Theorems

## Proof of Theorem 2

We fix an RKHS  $H$  on the input space  $X \subset \mathbb{R}^d$  with an RBF kernel  $k$ . Let  $\mathbf{x} = \{x_1, \dots, x_n\}$  be a set of objects to be ranked in  $\mathbb{R}^d$  with labels  $\mathbf{r} = \{r_1, \dots, r_n\}$ . Here  $r_i$  denotes the label of  $x_i$ , and  $r_i \in \mathbb{R}$ . We assume  $\mathbf{x}$  to be a random variable distributed according to  $P$ , and  $\mathbf{r}$  deterministic. Throughout  $L$  denotes the hinge loss.

The following notation will be useful in the proof of Theorem 2. Take  $T$  to be the set of pairs derived from  $\mathbf{x}$  and define the  $L$ -risk of  $f \in H$  as

$$\mathcal{R}_{L,P}(f) := E_{\mathbf{x}}[\mathcal{R}_{L,T}(f)]$$

where

$$\mathcal{R}_{L,T}(f) = \sum_{i,j:r_i>r_j} D(r_i, r_j)L(f(x_i) - f(x_j))$$

and  $D(r_i, r_j)$  is some positive weight function, which we take for simplicity to be  $1/|\mathcal{P}|$ ,  $\mathcal{P} = \{(i, j) : r_i > r_j\}$ .  $\mathcal{R}_{L,T}(f)$  is the *empirical*  $L$ -risk of  $f$ , with respect to the empirical distribution over the pairs of samples, which we denote by  $T$ . This uniform weight is the setting we have taken in the main body of the paper. The smallest possible  $L$ -risk in  $H$  is denoted

$$\mathcal{R}_{L,P} := \inf_{f \in H} \mathcal{R}_{L,P}(f).$$

The *regularized*  $L$ -risk is

$$\mathcal{R}_{L,P,\lambda}^{\text{reg}}(f) := \lambda \|f\|^2 + \mathcal{R}_{L,P}(f), \quad (1)$$

$\lambda > 0$ .

For simplicity we assume the preference pair set  $\mathcal{P}$  contains all pairs over these  $n$  samples. Let  $g_{\mathbf{x},\lambda}$  be the optimal solution to the rank-AD minimization step. We have,

$$g_{\mathbf{x},\lambda} = \arg \min_{f \in H} \mathcal{R}_{L,T}(f) + \lambda \|f\|^2 \quad (2)$$

Let  $\mathcal{H}_n$  denote a ball of radius  $O(1/\sqrt{\lambda_n})$  in  $H$ . Let  $C_k := \sup_{x,t} |k(x, t)|$  with  $k$  the rbf kernel associated to  $H$ . Given  $\epsilon > 0$ , we let  $N(\mathcal{H}, \epsilon/4C_k)$  be the covering number of  $\mathcal{H}$  by disks of radius  $\epsilon/4C_k$ . We first show that with appropriately chosen  $\lambda$ , as  $n \rightarrow \infty$ ,  $g_{\mathbf{x},\lambda}$  is consistent in the following sense.

**Proposition 1.** *Let  $\lambda_n$  be appropriately chosen such that  $\lambda_n \rightarrow 0$  and  $\frac{\log N(\mathcal{H}_n, \epsilon/4C_k)}{n\lambda_n} \rightarrow 0$ , as  $n \rightarrow \infty$ . Then we have*

$$E_{\mathbf{x}}[\mathcal{R}_{L,T}(g_{\mathbf{x},\lambda_n})] \rightarrow \mathcal{R}_{L,P} = \min_{f \in H} \mathcal{R}_{L,P}(f), \quad n \rightarrow \infty.$$

**Proof** Let us outline the argument. In [Steinwart, 2001], the author shows that there exists a  $f_{P,\lambda} \in H$  minimizing (1):

- For all Borel probability measures  $P$  on  $X \times X$  and all  $\lambda > 0$ , there is an  $f_{P,\lambda} \in H$  with

$$\mathcal{R}_{L,P,\lambda}^{\text{reg}}(f_{P,\lambda}) = \inf_{f \in H} \mathcal{R}_{L,P,\lambda}^{\text{reg}}(f)$$

such that  $\|f_{P,\lambda}\| = O(1/\sqrt{\lambda})$ . (If  $P$  is the empirical distribution over data  $T$ , then we denote this minimizer by  $f_{T,\lambda}$ .)

Next, a simple argument shows that

- $\lim_{\lambda \rightarrow 0} \mathcal{R}_{L,P,\lambda}^{\text{reg}}(f_{P,\lambda}) = \mathcal{R}_{L,P}$ .

Finally, we will need a concentration inequality to relate the  $L$ -risk of  $f_{P,\lambda}$  with the empirical  $L$ -risk of  $f_{T,\lambda}$ . We then derive consistency using the following argument:

$$\begin{aligned} \mathcal{R}_{L,P}(f_{T,\lambda_n}) &\leq \lambda_n \|f_{T,\lambda_n}\|^2 + \mathcal{R}_{L,P}(f_{T,\lambda_n}) \\ &\leq \lambda_n \|f_{T,\lambda_n}\|^2 + \mathcal{R}_{L,T}(f_{T,\lambda_n}) + \delta/3 \\ &\leq \lambda_n \|f_{P,\lambda_n}\|^2 + \mathcal{R}_{L,T}(f_{P,\lambda_n}) + \delta/3 \\ &\leq \lambda_n \|f_{P,\lambda_n}\|^2 + \mathcal{R}_{L,P}(f_{P,\lambda_n}) + 2\delta/3 \\ &\leq \mathcal{R}_{L,P} + \delta \end{aligned}$$

where  $\lambda_n$  is an appropriately chosen sequence  $\rightarrow 0$ , and  $n$  is large enough. The second and fourth inequality hold due to Concentration Inequalities, and the last one holds since  $\lim_{\lambda \rightarrow 0} \mathcal{R}_{L,P,\lambda}^{\text{reg}}(f_{P,\lambda}) = \mathcal{R}_{L,P}$ .

We now prove the appropriate concentration inequality [Cucker and Smale, 2001]. Recall  $H$  is an RKHS with smooth kernel  $k$ ; thus the inclusion  $I_k : H \rightarrow C(X)$  is compact, where  $C(X)$  is given the  $\|\cdot\|_\infty$ -topology. That is, the ‘‘hypothesis space’’  $\mathcal{H} := \overline{I_k(B_R)}$  is compact in  $C(X)$ , where  $B_R$  denotes the ball of radius  $R$  in  $H$ . We denote by  $N(\mathcal{H}, \epsilon)$  the covering number of  $\mathcal{H}$  with disks of radius  $\epsilon$ . We prove the following inequality:

**Lemma 2.** *For any probability distribution  $P$  on  $X \times X$ ,*

$$P^{\epsilon_n} \{T \in (X \times X)^{\epsilon_n} : \sup_{f \in \mathcal{H}} |\mathcal{R}_{L,T}(f) - \mathcal{R}_{L,P}(f)| \geq \epsilon\} \leq 2N(\mathcal{H}, \epsilon/4C_k) \exp\left(\frac{-\epsilon^2 n}{2(1 + 2\sqrt{C_k}R)^2}\right),$$

where  $C_k := \sup_{x,t} |k(x,t)|$ .

**Proof** Since  $\mathcal{H}$  is compact, it has a finite covering number. Now suppose  $\mathcal{H} = D_1 \cup \dots \cup D_\ell$  is any finite covering of  $\mathcal{H}$ . Then

$$\text{Prob}\{\sup_{f \in \mathcal{H}} |\mathcal{R}_{L,T}(f) - \mathcal{R}_{L,P}(f)| \geq \epsilon\} \leq \sum_{j=1}^{\ell} \text{Prob}\{\sup_{f \in D_j} |\mathcal{R}_{L,T}(f) - \mathcal{R}_{L,P}(f)| \geq \epsilon\}$$

so we restrict attention to a disk  $D$  in  $\mathcal{H}$  of appropriate radius  $\epsilon$ .

Suppose  $\|f - g\|_\infty \leq \epsilon$ . We want to show that the difference

$$|(\mathcal{R}_{L,T}(f) - \mathcal{R}_{L,P}(f)) - (\mathcal{R}_{L,T}(g) - \mathcal{R}_{L,P}(g))|$$

is also small. Rewrite this quantity as

$$|(\mathcal{R}_{L,T}(f) - \mathcal{R}_{L,T}(g)) - E_{\mathbf{x}}[\mathcal{R}_{L,T}(g) - \mathcal{R}_{L,T}(f)]|.$$

Since  $\|f - g\|_\infty \leq \epsilon$ , for  $\epsilon$  small enough we have

$$\begin{aligned} \max\{0, 1 - (f(x_i) - f(x_j))\} - \max\{0, 1 - (g(x_i) - g(x_j))\} &= \max\{0, (g(x_i) - g(x_j) - f(x_i) + f(x_j))\} \\ &= \max\{0, \langle g - f, \phi(x_i) - \phi(x_j) \rangle\}. \end{aligned}$$

Here  $\phi : X \rightarrow H$  is the feature map,  $\phi(x) := k(x, \cdot)$ . Combining this with the Cauchy-Schwarz inequality, we have

$$|(\mathcal{R}_{L,T}(f) - \mathcal{R}_{L,T}(g)) - E_{\mathbf{x}}[\mathcal{R}_{L,T}(g) - \mathcal{R}_{L,T}(f)]| \leq \frac{2}{n^2}(2n^2\|f - g\|_\infty C_k) \leq 4C_k\epsilon,$$

where  $C_k := \sup_{x,t} |k(x,t)|$ . From this inequality it follows that

$$|\mathcal{R}_{L,T}(f) - \mathcal{R}_{L,P}(f)| \geq (4C_k + 1)\epsilon \implies |(\mathcal{R}_{L,T}(g) - \mathcal{R}_{L,P}(g))| \geq \epsilon.$$

We thus choose to cover  $\mathcal{H}$  with disks of radius  $\epsilon/4C_k$ , centered at  $f_1, \dots, f_\ell$ . Here  $\ell = N(\mathcal{H}, \epsilon/4C_k)$  is the covering number for this particular radius. We then have

$$\sup_{f \in D_j} |(\mathcal{R}_{L,T}(f) - \mathcal{R}_{L,P}(f))| \geq 2\epsilon \implies |(\mathcal{R}_{L,T}(f_j) - \mathcal{R}_{L,P}(f_j))| \geq \epsilon.$$

Therefore,

$$\text{Prob}\{\sup_{f \in \mathcal{H}} |\mathcal{R}_{L,T}(f) - \mathcal{R}_{L,P}(f)| \geq 2\epsilon\} \leq \sum_{j=1}^n \text{Prob}\{|\mathcal{R}_{L,T}(f_j) - \mathcal{R}_{L,P}(f_j)| \geq \epsilon\}$$

The probabilities on the RHS can be bounded using McDiarmid's inequality.

Define the random variable  $g(x_1, \dots, x_n) := \mathcal{R}_{L,T}(f)$ , for fixed  $f \in H$ . We need to verify that  $g$  has bounded differences. If we change one of the variables,  $x_i$ , in  $g$  to  $x'_i$ , then at most  $n$  summands will change:

$$\begin{aligned} |g(x_1, \dots, x_i, \dots, x_n) - g(x_1, \dots, x'_i, \dots, x_n)| &\leq \frac{1}{n^2} 2n \sup_{x,y} |1 - (f(x) - f(y))| \\ &\leq \frac{2}{n} + \frac{2}{n} \sup_{x,y} |f(x) - f(y)| \\ &\leq \frac{2}{n} + \frac{4}{n} \sqrt{C_k} \|f\|. \end{aligned}$$

Using that  $\sup_{f \in \mathcal{H}} \|f\| \leq R$ , McDiarmid's inequality thus gives

$$\text{Prob}\{\sup_{f \in \mathcal{H}} |\mathcal{R}_{L,T}(f) - \mathcal{R}_{L,P}(f)| \geq \epsilon\} \leq 2N(\mathcal{H}, \epsilon/4C_k) \exp\left(\frac{-\epsilon^2 n}{2(1 + 2\sqrt{C_k}R)^2}\right).$$

■

We are now ready to prove Theorem 2. Take  $R = \|f_{P,\lambda}\|$  and apply this result to  $f_{P,\lambda}$ :

$$\text{Prob}\{|\mathcal{R}_{L,T}(f_{P,\lambda}) - \mathcal{R}_{L,P}(f_{P,\lambda})| \geq \epsilon\} \leq 2N(\mathcal{H}, \epsilon/4C_k) \exp\left(\frac{-\epsilon^2 n}{2(1 + 2\sqrt{C_k}\|f_{P,\lambda}\|)^2}\right).$$

Since  $\|f_{P,\lambda_n}\| = O(1/\sqrt{\lambda_n})$ , the RHS converges to 0 so long as  $\frac{n\lambda_n}{\log N(\mathcal{H}, \epsilon/4C_k)} \rightarrow \infty$  as  $n \rightarrow \infty$ . This completes the proof of Theorem 2.

■

We now establish that under mild conditions on the surrogate loss function, the solution minimizing the expected surrogate loss will asymptotically recover the correct preference relationships given by the density  $f$ .

**Proposition 3.** *Let  $L$  be a non-negative, non-increasing convex surrogate loss function that is differentiable at zero and satisfies  $L'(0) < 0$ . If*

$$g^* = \arg \min_{g \in H} E_{\mathbf{x}} [\mathcal{R}_{L,T}(g)],$$

*then  $g^*$  will correctly rank the samples according to their density, i.e.  $\forall x_i \neq x_j, f(x_i) > f(x_j) \implies g^*(x_i) > g^*(x_j)$ . Assume the input preference pairs satisfy:  $\mathcal{P} = \{(x_i, x_j) : f(x_i) > f(x_j)\}$ , where  $\mathbf{x} = \{x_1, \dots, x_n\}$  is drawn i.i.d. from distribution  $f$ . Let  $\ell$  be some convex surrogate loss function that satisfies: (1)  $\ell$  is non-negative and non-increasing; (2)  $\ell$  is differentiable and  $\ell'(0) < 0$ . Then the optimal solution:  $g^*$ , will correctly rank the samples according to  $f$ , i.e.  $g^*(x_i) > g^*(x_j)$ ,  $\forall x_i \neq x_j, f(x_i) > f(x_j)$ , .*

The hinge-loss satisfies the conditions in the above theorem. Combining Theorem 1 and 3, we establish that asymptotically, the rankAD step yields a ranker that preserves the preference relationship on nominal samples given by the nominal density  $f$ .

**Proof** Our proof follows similar lines of Theorem 4 in [Lan et al., 2012]. Assume that  $g(x_i) < g(x_j)$ , and define a function  $g'$  such that  $g'(x_i) = g(x_j)$ ,  $g'(x_j) = g(x_i)$ , and  $g'(x_k) = g(x_k)$  for all  $k \neq i, j$ . We have  $\mathcal{R}_{L,P}(g') - \mathcal{R}_{L,P}(g) = E_{\mathbf{x}}(A(\mathbf{x}))$ , where

$$\begin{aligned}
A(\mathbf{x}) = & \sum_{k:r_j < r_i < r_k} [D(r_k, r_j) - D(r_k, r_i)][L(g(x_k) - g(x_i)) - L(g(x_k) - g(x_j))] \\
& + \sum_{k:r_j < r_k < r_i} D(r_i, r_k)[L(g(x_j) - g(x_k)) - L(g(x_i) - g(x_k))] \\
& + \sum_{k:r_j < r_k < r_i} D(r_k, r_j)[L(g(x_k) - g(x_i)) - L(g(x_k) - g(x_j))] \\
& + \sum_{k:r_j < r_i < r_k} [D(r_k, r_j) - D(r_k, r_i)][L(g(x_k) - g(x_i)) - L(g(x_k) - g(x_j))] \\
& + \sum_{k:r_j < r_i < r_k} [D(r_i, r_k) - D(r_j, r_k)][L(g(x_j) - g(x_k)) - L(g(x_i) - g(x_k))] \\
& \quad + (L(g(x_j) - g(x_i)) - L(g(x_i) - g(x_j)))D(r_i, r_j).
\end{aligned}$$

Using the requirements of the weight function  $D$  and the assumption that  $L$  is non-increasing and non-negative, we see that all six sums in the above equation for  $A(\mathbf{x})$  are negative. Thus  $A(\mathbf{x}) < 0$ , so  $\mathcal{R}_{L,P}(g') - \mathcal{R}_{L,P}(g) = E_{\mathbf{x}}(A(\mathbf{x})) < 0$ , contradicting the minimality of  $g$ . Therefore  $g(x_i) \geq g(x_j)$ .

Now we assume that  $g(x_i) = g(x_j) = g_0$ . Since  $\mathcal{R}_{L,P}(g) = \inf_{h \in H} \mathcal{R}_{L,P}(h)$ , we have  $\left. \frac{\partial \ell_L(g; x)}{\partial g(x_i)} \right|_{g_0} = A = 0$ , and  $\left. \frac{\partial \ell_L(g; x)}{\partial g(x_j)} \right|_{g_0} = B = 0$ , where

$$\begin{aligned}
A = & \sum_{k:r_j < r_i < r_k} D(r_k, r_i)[-L'(g(x_k) - g_0)] + \sum_{k:r_j < r_k < r_i} D(r_i, r_k)L'(g_0 - g(x_k)) + \\
& \sum_{k:r_k < r_j < r_i} D(r_i, r_k)L'(g_0 - g(x_k)) + D(r_i, r_j)[-L'(0)].
\end{aligned}$$

$$\begin{aligned}
B = & \sum_{k:r_j < r_i < r_k} D(r_k, r_j)[-L'(g(x_k) - g_0)] + \sum_{k:r_j < r_k < r_i} D(r_k, r_j)L'(g_0 - g(x_k)) + \\
& \sum_{k:r_k < r_j < r_i} D(r_j, r_k)L'(g_0 - g(x_k)) + D(r_i, r_j)[-L'(0)].
\end{aligned}$$

However, using  $L'(0) < 0$  and the requirements of  $D$  we have

$$A - B \leq 2L'(0)D(r_i, r_j) < 0,$$

contradicting  $A = B = 0$ . ■

The following lemma completes the proof of Theorem 2:

**Lemma 4.** *Assume  $G$  is any function that gives the same order relationship as the density:  $G(x_i) > G(x_j)$ ,  $\forall x_i \neq x_j$  such that  $f(x_i) > f(x_j)$ . Then*

$$\frac{1}{n} \sum_{i=1}^n \mathbf{1}_{\{G(x_i) \leq G(\eta)\}} \rightarrow p(\eta). \quad (3)$$

## Proof of Theorem 3

To prove Theorem 3 we need the following lemma [Vapnik, 1979]:

**Lemma 5.** *Let  $\mathcal{X}$  be a set and  $S$  a system of sets in  $\mathcal{X}$ , and  $P$  a probability measure on  $S$ . For  $\mathbf{X} \in \mathcal{X}^n$  and  $A \in S$ , define  $\nu_{\mathbf{X}}(A) := |\mathbf{X} \cap A|/n$ . If  $n > 2/\epsilon$ , then*

$$P^n \left\{ \mathbf{X} : \sup_{A \in S} |\nu_{\mathbf{X}}(A) - P(A)| > \epsilon \right\} \leq 2P^{2n} \left\{ \mathbf{X}\mathbf{X}' : \sup_{A \in S} |\nu_{\mathbf{X}}(A) - \nu_{\mathbf{X}'}(A)| > \epsilon/2 \right\}.$$

Now to the proof of the Theorem. Consider the event

$$J := \left\{ \mathbf{X} \in \mathcal{X}^n : \exists f \in \mathcal{F}, P\{x : f(x) < f^{(m)} - 2\gamma\} > \frac{m-1}{n} + \epsilon \right\}.$$

We must show that  $P^n(J) \leq \delta$  for  $\epsilon = \epsilon(n, k, \delta)$ . Fix  $k$  and apply lemma 5 with

$$A = \{x : f(x) < f^{(m)} - 2\gamma\}$$

with  $\gamma$  small enough so that

$$\nu_{\mathbf{X}}(A) = |\{x_j \in \mathbf{X} : f(x_j) < f^{(m)} - 2\gamma\}|/n = \frac{m-1}{n}.$$

We obtain

$$P^n(J) \leq 2P^{2n} \left\{ \mathbf{X}\mathbf{X}' : \exists f \in \mathcal{F}, |\{x'_j \in \mathbf{X}' : f(x'_j) < f^{(m)} - 2\gamma\}| > \epsilon n/2 \right\}.$$

The remaining portion of the proof follows as Theorem 12 in [Schölkopf et al., 2001].

## References

- F. Cucker and S. Smale. On the mathematical foundations of learning. In *Bull. Amer. Math. Soc.*, pages 1–49, 2001.
- Y. Lan, J. Guo, X. Cheng, and T. Liu. Statistical consistency of ranking methods in a rank-differentiable probability space. In *Advances in Neural Information Processing Systems*, pages 1241–1249, 2012.
- B. Schölkopf, J.C. Platt, J. Shawe-Taylor, A.J. Smola, and R.C. Williamson. Estimating the support of a high-dimensional distribution. *Neural computation*, 13(7): 1443–1471, 2001.
- I. Steinwart. Consistency of support vector machines and other regularized kernel machines. In *IEEE Trans. Inform. Theory*, pages 67–93, 2001.
- V. Vapnik. *Estimation of Dependences Based on Empirical Data [in Russian]*. English translation: Springer Verlag, New York, 1982, 1979.
